# Supplementary material
Source: publisher site journal article supplement (https://www.kjim.org/upload/media/kjim-2020-386-suppl1.pdf)
Supplement: Supplementary file 1 [file kjim-2020-386-suppl1.pdf]

**Supplementary Table 1. Baseline characteristics of the patients who did not undergo immunosuppressive therapy**

| Characteristic                                                        | UC (n = 107) | CD (n = 75) | All patients (n = 182) |
|-----------------------------------------------------------------------|--------------|-------------|------------------------|
| Male sex                                                              | 65 (60.7)    |             | 119 (65.4)             |
| Age at diagnosis, yr                                                  | 36 (26–50)   |             | 30 (22–42)             |
| Age at serological test, yr                                           | 39 (28–55)   |             | 32 (32–48)             |
| Disease duration at serological test, mo                              | 5 (0–39)     |             | 2 (0–31)               |
| Family history of IBD                                                 | 11 (10.3)    |             | 14 (7.7)               |
| Disease extent of UC at serological test                              |              |             |                        |
| Proctitis                                                             | 51 (47.7)    |             |                        |
| Left-sided colitis                                                    | 30 (28.0)    |             |                        |
| Extensive colitis                                                     | 26 (24.3)    |             |                        |
| Disease location of CD at serological test                            |              |             |                        |
| Ileum                                                                 |              | 19 (25.3)   |                        |
| Colon                                                                 |              | 5 (6.7)     |                        |
| Ileocolon                                                             |              | 51 (68.0)   |                        |
| Upper gastrointestinal involvement                                    |              | 18 (24.0)   |                        |
| Disease behavior of CD at serological test                            |              |             |                        |
| Non-stricturing, non-penetrating                                      |              | 46 (61.3)   |                        |
| Stricturing                                                           |              | 13 (17.3)   |                        |
| Penetrating                                                           |              | 16 (21.4)   |                        |
| Perianal disease                                                      |              | 37 (49.3)   |                        |
| Bowel resection surgery history at serological test among CD patients |              | 10 (13.3)   |                        |

Values are presented as number (%) or median (range).

UC, ulcerative colitis; CD, Crohn's disease; IBD, inflammatory bowel disease.
